# Supplementary material
Source: PubMed Central journal article supplement (PMC3742149)
Supplement: supp_140.17.3691_DEV088328.pdf [file supp_140.17.3691_DEV088328.pdf]

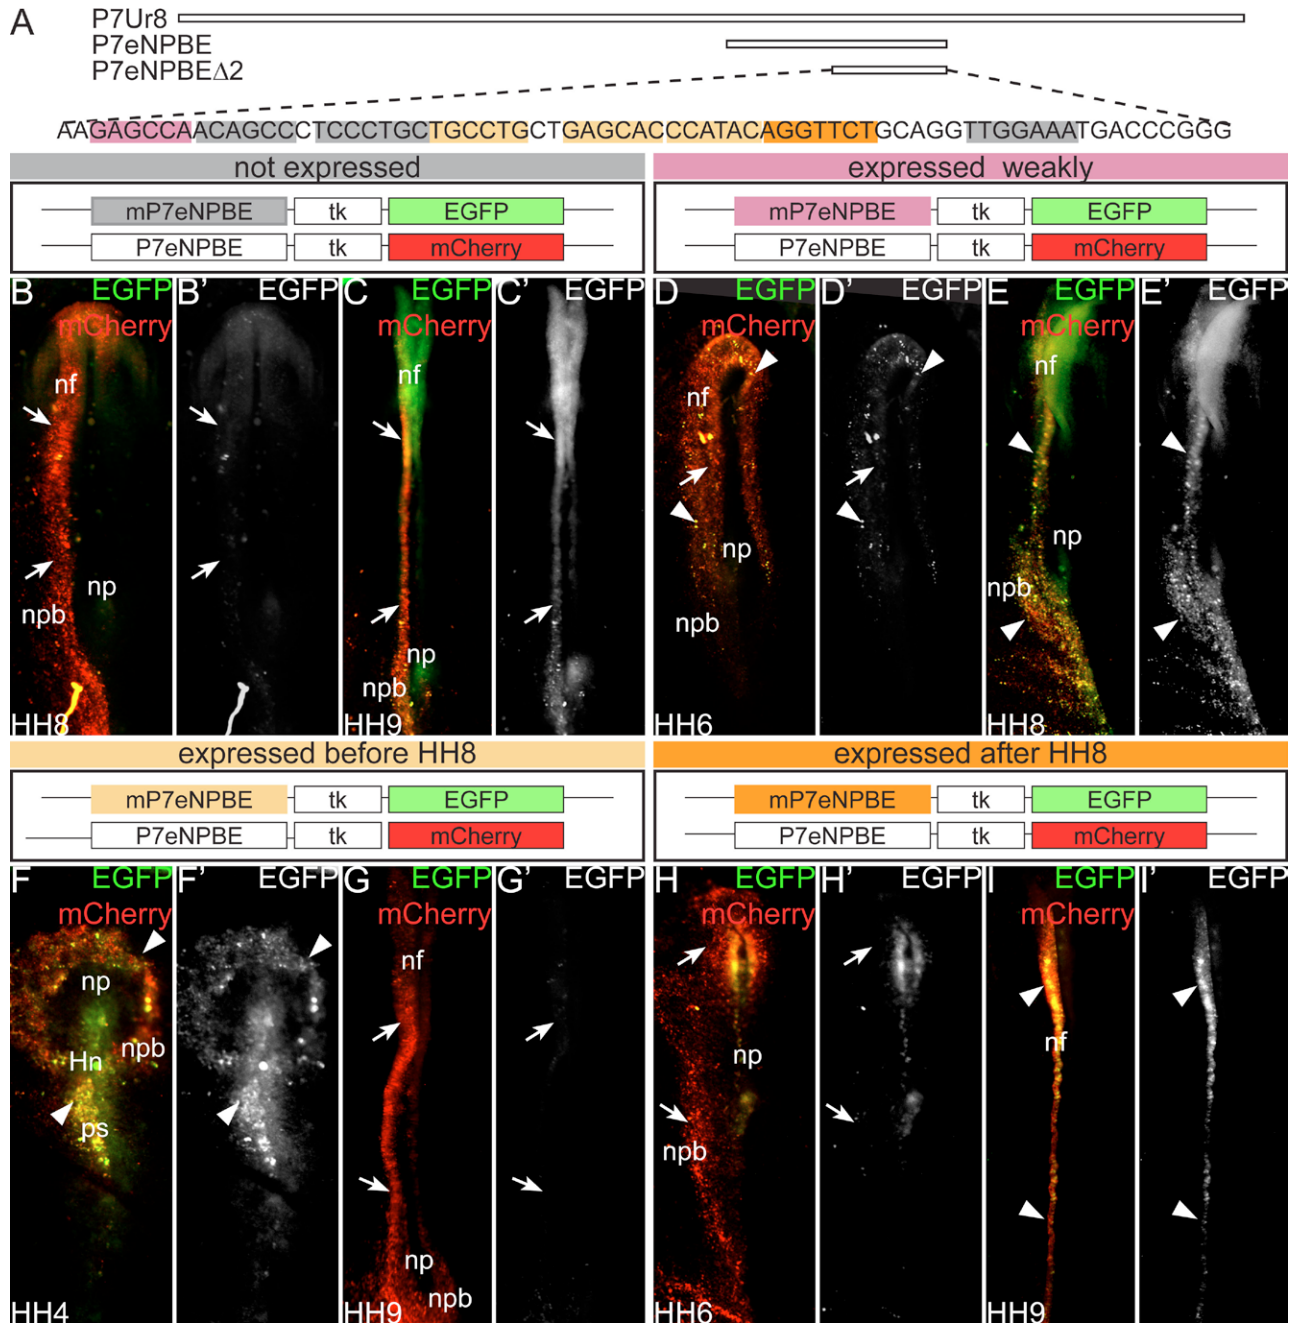

**Fig. S1. Mutational analysis identified crucial bases for P7eNPBE enhancer activity.** (A) A mutational analysis was performed to determine which binding sites are crucial for the enhancer activity of P7eNPBE. (B-I') Embryos were co-electroporated with wild-type P7eNPBE driving mCherry and mutated P7eNPBE (termed mP7eNPBE) driving EGFP to directly compare wild type with mutated enhancer activity in the same embryo. (B-C') The first type of mutation completely eliminated the activity of P7eNPBE at all stages screened. Although the wild-type enhancer (red) is expressed in the neural plate and neural plate border at HH8 (B) and HH9 (C), the mutated enhancers (green) are not expressed (B', C', arrows). (D-E') The second type of mutation retains the spatiotemporal enhancer activity, but is generally expressed less brightly or in fewer cells. The wild-type enhancer (red) is robustly expressed in the neural plate and neural plate border at HH6 (D) and HH8 (E). The mutated enhancer (green) is also expressed in the neural plate and neural plate border (D', E', arrowheads), but often there are many cells not expressing the enhancer as robustly or even at all (D', arrow). (F-I') The remaining two types of mutations had stage-specific effects, with the mutated enhancers only expressed either before HH8 (F-G') or after HH8 (H-I'). (F-G') The wild-type (red) and mutated (green) enhancers are expressed at HH4 (F, F') surrounding Hensen's node and in the primitive streak (arrowheads). But while the wild-type enhancer expression continues in the neural folds, neural plate and neural plate border at HH9 (G), the mutated enhancers are not expressed (G', arrows). (H-I') The final type of mutation is expressed only after HH8. The wild-type enhancer (red) is expressed in the neural plate border at HH6 (H) but the mutated enhancer (green) is not (H', arrows). However, at HH9, both forms are expressed in the neural folds and neural plate border (I, I', arrowheads). Hn, Hensen's node; np, neural plate; npb, neural plate border; nne, non-neural ectoderm; nf, neural folds; ps, primitive streak.

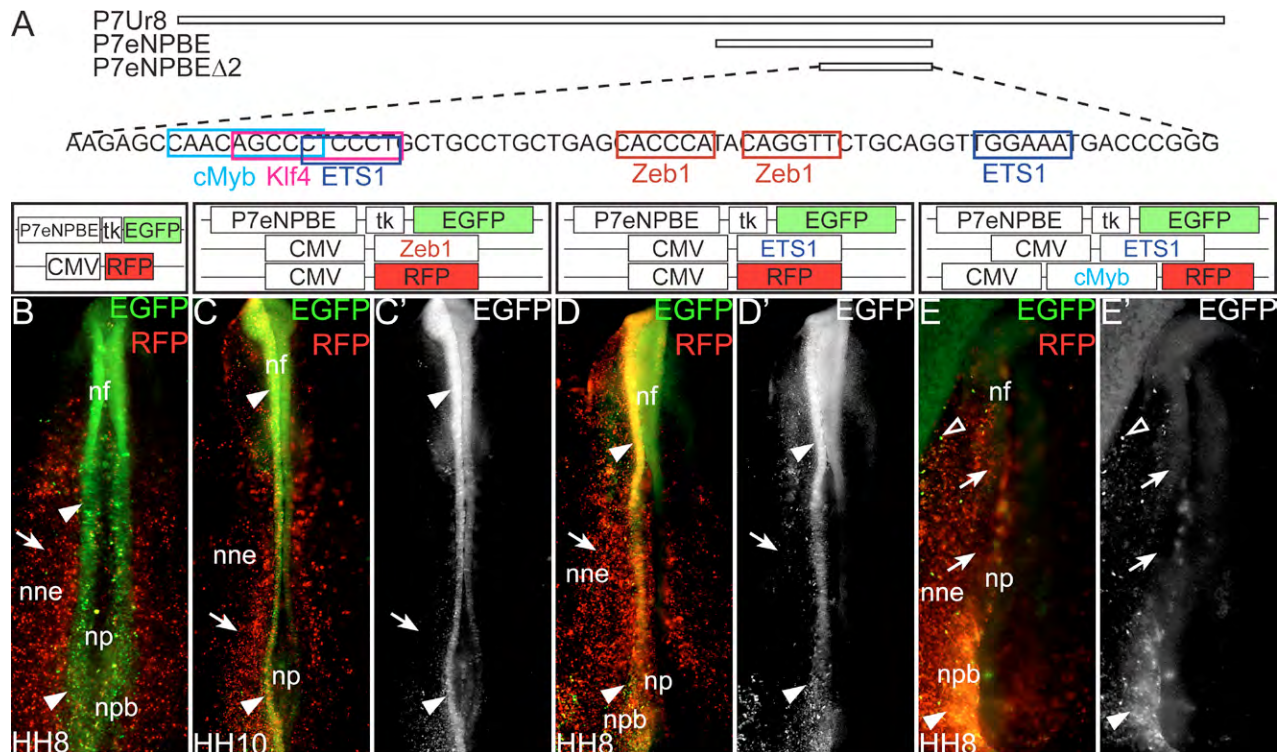

**Fig. S2. Zeb1 and ETS1 are not sufficient to alter the enhancer activity of P7NCE.** (A) Position size and sequence of the enhancer P7eNPBEΔ2 in comparison with the P7Ur8 and the P7eNPBE. Boxes in sequence from A indicate putative transcription factor-binding sites modulating enhancer activity, and include cMyb (light blue box), Klf4 (pink box), ETS1 (dark blue boxes) and Zeb1 (red boxes). (B-E') These transcription factors were overexpressed by electroporation to assess possible effect on P7eNPBE enhancer activity. (B) At HH8, P7eNPBE (green) is normally robustly expressed in the neural plate and neural plate border (arrowheads) and is restricted from the non-neural ectoderm (arrows). (C-D') Ectopic expression of either Zeb1 (C,C', red) or ETS1 (D,D', red) does not alter the normal expression of P7eNPBE (green), which is still present in the neural plate and neural plate border (arrowheads), and is restricted from the non-neural ectoderm (arrows). (E,E') At HH8, when ETS1 and cMyb (red) are ectopically expressed together, P7eNPBE (green) expression is no longer restricted from the non-neural ectoderm (open arrowhead) and is in a 'salt and pepper' pattern. Although some cells in the neural plate and neural folds still express P7eNPBE (closed arrowhead), there are many cells that do not (arrows). np, neural plate; npb, neural plate border; nne, non-neural ectoderm; nf, neural folds.

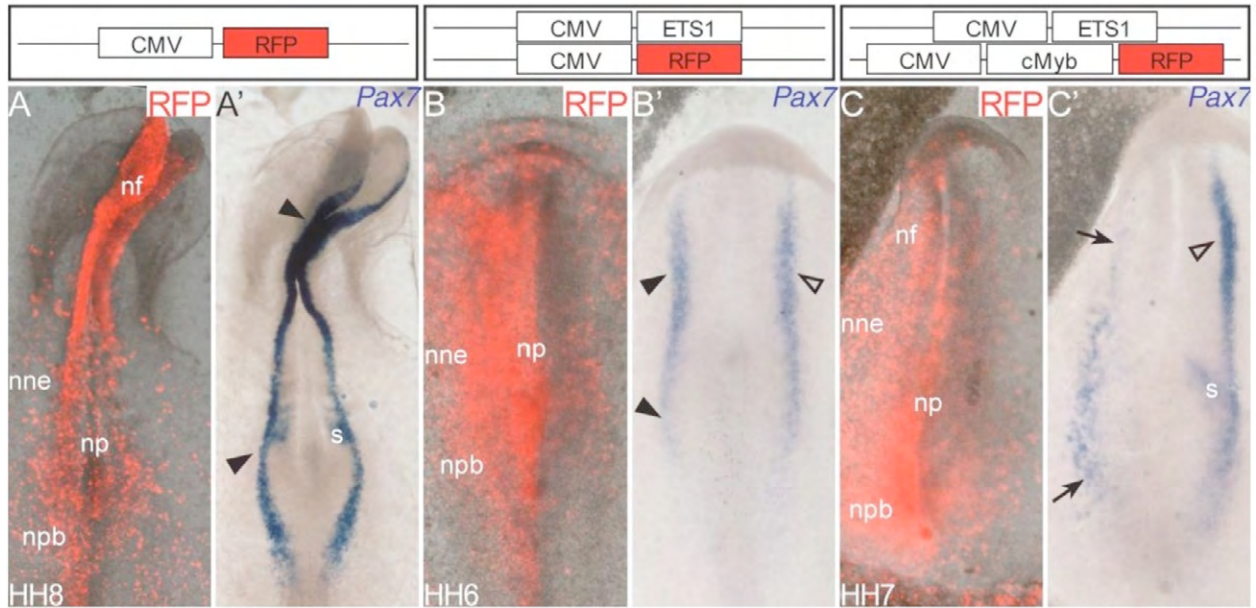

**Fig. S3. Ectopic expression of ETS1 does not alter Pax7 mRNA expression.** (A-C') Empty vector control (A,A'), ETS1 (B,B') or ETS1 and cMyb (C,C') were ectopically expressed in embryos, which were subsequently stained for *Pax7* mRNA by in situ hybridization. (A,A') At HH8, embryos misexpressing the control express *Pax7* (blue) in the neural folds and somites (closed arrowheads) as normal. (B,B') At HH6, embryos misexpressing ETS1 display normal *Pax7* mRNA expression (blue) in the electroporated neural fold (closed arrowheads) when compared with the untreated neural fold (open arrowhead). (C,C') At HH7, embryos treated with both ETS1 and cMyb show reduced levels of *Pax7* mRNA (blue) in the electroporated neural fold (arrows) and in the first forming somite (double arrowhead) compared with the untreated side (open arrowheads). The expression is not expanded into the neural plate or non-neural ectoderm. np, neural plate; npb, neural plate border; nne, non-neural ectoderm; nf, neural folds; s, somites.

**Table S1. Summary of binding sites affected by mutagenesis**

| Mutation                     | 1                                               | 2                                                        | 3                             | 4                                 | 5                          | 6                                                                | 7                | 8                                                                       |
|------------------------------|-------------------------------------------------|----------------------------------------------------------|-------------------------------|-----------------------------------|----------------------------|------------------------------------------------------------------|------------------|-------------------------------------------------------------------------|
| Wild type sequence           | GAGCCA                                          | ACAGCC                                                   | TCCCTGC                       | TGCCTG                            | GAGCAC                     | CCATAC                                                           | AGGTTCT          | TTGGAAA                                                                 |
| Mutated sequence             | TCTAAC                                          | CACTAA                                                   | GAAAGTA                       | GTAAGT                            | TCTACA                     | AACGCA                                                           | CTTGGAG          | GGTTCCC                                                                 |
| Activity                     | +                                               | -                                                        | -                             | +/-                               | +/-                        | +/-                                                              | +/-              | -                                                                       |
|                              | (weak)                                          |                                                          |                               | (+ before<br>HH8)                 | (+ before<br>HH8)          | (+ before<br>HH8)                                                | (+ after<br>HH8) |                                                                         |
| Sites<br>deleted or<br>moved | FOXA1<br>NFIC<br>TFAP2A<br>BRCA1<br>Mafb<br>Myb | FOXA1<br>TFAP2A<br>BRCA1<br>Mafb<br>Myb<br>BRCA1<br>Klf4 | Klf4<br>ETS1<br>BRCA1<br>Mafb | SP1<br>BRCA1<br>Mfab<br>Arnt::Ahr | INSM1<br>Arnt::Ahr<br>Zeb1 | INSM1<br>MZF1_5_13<br>Arnt::Ahr<br>Zeb1<br>YY1<br>GATA2<br>FOXC1 | Zeb1<br>SPIB     | BRCA1<br>CEBPA<br>ELF5<br>ETS1<br>NFIC<br>HoxA5<br>NFATC2<br>REL<br>REL |
| Sites added                  | GATA2<br>BRCA1                                  | RUNX1<br>ZNF354C                                         | ELK1<br>ELK1                  | FOXc1<br>AP1                      | ZNF354C<br>FOXC1           | RUNX1<br>En1                                                     | EBF1<br>Hltf     | ESR1<br>En1                                                             |

|  |       |       |        |           |       |           |         |       |
|--|-------|-------|--------|-----------|-------|-----------|---------|-------|
|  | GATA3 | SOX10 | E2F1   | Arnt::Ahr | FOXL1 | BRCA1     | Zeb1    | ESR2  |
|  | RUNX1 | HoxA5 | TFAP2  | SPIB      | Zeb1  | SOX10     | TFAP2A  | NFKB1 |
|  | SOX10 | GATA3 | FEV    | NKX3-1    |       | Zfp423    | NFIC    | ETS1  |
|  |       | Pdx1  | FOXC1  |           |       | Zfp423    | ZNF354C |       |
|  |       | ELF5  | SP1    |           |       | Arnt::Ahr | Znf143  |       |
|  |       | FEV   | NKX3-1 |           |       | Hltf      |         |       |
|  |       | SPI1  | Prx2   |           |       | ETS1      |         |       |
|  |       |       | FOXL1  |           |       | Nr2e3     |         |       |
|  |       |       | GATA2  |           |       | Nr2e3     |         |       |

Sequence blocks of 6-7 bp were mutated in the enhancer P7eNPBE to determine the critical bases for enhancer activity. Putative binding sites were identified in wild-type and mutated forms of the enhancer using JASPAR (Bryne et al., 2008). All mutated forms of P7eNPBE modulated the activity, and all of them eliminated several overlapping binding sites while adding several new sites.

Table S2. Primers for *Pax7* upstream regions (putative enhancer regions)

| Region | Primers (5'-3')                                                      |
|--------|----------------------------------------------------------------------|
| P7Ur1  | GAGCGGTACCCTCCTCTGAGCATTTCACC<br>GAGCCTCGAGTCACAACCTATTTCTCGGCG      |
| P7Ur2  | GAGCGGTACCCCTCTGAGCATTTCACCC<br>GAGCCTCGAGGAGCAGCATGGAAAATAGCC       |
| P7Ur3  | GAGCGGTACCATTTCAGTTCCCATTCTGC<br>GAGCCTCGAGACGTCCAAAGCAACTCTTCG      |
| P7Ur4  | GAGCGGTACCAGAGAAGGAAACCTCTCCCC<br>GAGCCTCGAGGGACAAATCCTATCTGTAAGACGC |
| P7Ur5  | GAGCGGTACCTGATGACCAAACTGGGAGC<br>GAGCCTCGAGCAATAATCACTGCTGCTGGG      |
| P7Ur6  | GAGCGGTACCTAACCATGTCCCTCAGTGCC<br>GAGCCTCGAGCACTTGGTTGTAGGAATGGG     |
| P7Ur7  | GAGCGGTACCCACCGAGTTTCACGTTAGGG<br>GAGCCTCGAGGGAGGTTGCTACAATGAGGG     |
| P7Ur8  | GAGCGGTACCGCACAGAAAGGCAATAACCC<br>GAGCCTCGAGAAAGCAACTATAAAACCCCGC    |
| P7Ur9  | GAGCGGTACCTTTTAGCAGTGTGTTTGCGG<br>GAGCCTCGAGGACAGGGAAACACACCCAAC     |
| P7Ur10 | GAGCGGTACCGTTGTGTTCCATCACCTCCC<br>GAGCCTCGAGGTTGGGTGAAAACACTTGCC     |
| P7Ur11 | GAGCGGTACCAAGGAAGAGGAAATGCAGGG<br>GAGCCTCGAGTATTTAGAGGGACTTCCGC      |
| P7Ur12 | GAGCGGTACCGAAGGAGCTCTCAAACACCG<br>GAGCCTCGAGAATCACCCATACTTTCCCC      |

Table S3. Primers used to generate deletions and smaller constructs from P7Ur8

| Region    | Primers (5'-3')                                                                                      |
|-----------|------------------------------------------------------------------------------------------------------|
| P7Ur8Δ1   | AACATTTTTCCCTCTTCTTCCCCTGTGCT<br>AGCACAGGGGAAGAAGAGGGAAAAATGTTT                                      |
| P7Ur8Δ2   | CCTCTCCCATTGGGGCCATCTGGGTTTTGG<br>CCAAAACCCAGATGGCCCAATGGGAGAGG                                      |
| P7Ur8Δ3   | TTTAACCTTTTCTTCGGCAGTTAGAAGGCA<br>TGCCTTCTAACTGCCGAAGAAAAGGTAAA                                      |
| P7Ur8Δ4   | CCAAAATTTCCATCTCAGGAGAGACGGAAC<br>GTTCCGTCTCTCTGAGATGGAAATTTTGG                                      |
| P7Ur8Δ5   | ATTGCAACGTGGCAGAGAGGATGAAAAGAG<br>CTCTTTTCATCCTCTCTGCCACGTTGCAAT                                     |
| P7Ur8Δ6   | TGAATCTCACACAGGACAGGTTCTGCAGGT<br>ACCTGCAGAACCTGTCCTGTGTGAGATTCA                                     |
| P7Ur8Δ7   | CACAAAAGCAGAGGGAAACTCAACTCAA<br>TTTGAGTTGAGTTTCCCTCTGCTTTTTGTG                                       |
| P7Ur8Δ8   | GGAGAGCTCTGCTCGGACGAGTCCTAAGC<br>GCTTAGGACTCGTCCGAGCAGAGCTCTTCC                                      |
| P7Ur8Δ9   | GAGCGGTACCGCACAGAAAGGCAATAACCC<br>CTCAGAGCTCTGTGTGAGATTCACTGAT                                       |
| P7Ur8Δ9G  | CTCAGAGCTCTGTGTGAGATTCACTGAT<br>CTGAGAGCTCTCGACTTCAAGGAGGACG<br>CTGAGAGCTCTCCTCGATGTTGTGGCGGATCTTGAA |
| P7eNPBE   | GACTGGTACCTTCATCCTCTGCTTTTTGTG<br>GTAGCTCGAGTCACACAGGTCCAGGAGAGA                                     |
| P7eNPBED1 | GTAGCTCGAGTCACACAGGTCCAGGAGAGA<br>ATTACCCGGGAGGTCCAGGAGAGACGGA                                       |
| P7eNPBED2 | ATTACDCCGGGAGCCAACAGCCCTCC<br>GTAGCTCGAGTCACACAGGTCCAGGAGAGA                                         |

Primer pairs designed to generate and clone specific deletions ( $\Delta$ ) of Pax7 upstream region 8 (P7Ur8), as well as the smaller elements derived from it.

Table S4. Mutagenesis analysis of P7eNPBE

| Region | Primers (5'-3')                                                                                                            |
|--------|----------------------------------------------------------------------------------------------------------------------------|
| M1     | GCTCAGCAGGCAGCAGGGAGGGCTGTGTTAGATTTTCATCCTCTGCTTTTTGTGATGC<br>GCATCACAAAAAGCAGAGGATGAAAACTCTAACACAGCCCTCCCTGCTGCCTGCTGAGC  |
| M2     | GGGTGCTCAGCAGGCAGCAGGGAGTTAGTGTGGCTCTTTTCATCCTCTGCTTTT<br>AAAAGCAGAGGATGAAAAGAGCCACACTAACTCCCTGCTGCCTGCTGAGCACCC           |
| M3     | GCAGAACCTGTATGGGTGCTCAGCAGGCA TACTTTCGGGCTGTTGGCTCTTTTCATCC<br>GGATGAAAAGAGCCAACAGCCCCGAAAGTATGCCTGCTGAGCACCCATACAGGTTCTGC |
| M4     | GCAGAACCTGTATGGGTGCTCAGACTTACGCAGGGAGGGCTGTTGGCTCTTT<br>AAAGAGCCAACAGCCCTCCCTGCGTAAGTCTGAGCACCCATACAGGTTCTGC               |
| M5     | CCAAACCTGCAGAACCTGTATGGTGTAGAAGCAGGCAGCAGGGAGGGCTGTT<br>AACAGCCCTCCCTGCTGCCTGCTTCTACACCATACAGGTTCTGCAGGTTTGG               |
| M6     | TCGTTTCCAAACCTGCAGAACCTTGCGTTGTGCTCAGCAGGCAGCAGGGAGG<br>CCTCCCTGCTGCCTGCTGAGCACACGCAAGGTTCTGCAGGTTTGGAAACGA                |
| M7     | AGCCCGGGTCGTTTCCAAACCTGCCTCCAAGGTATGGGTGCTCAGCAGGCAGCAG<br>CTGCTGCCTGCTGAGCACCCATACCTTGAGGCAGGTTTGGAAACGACCCGGGCT          |
| M8     | TCTTACGCGTGCTAGCCCGGGTCGGGAACCACCTGCAGAACCTGTATGGGTGCT<br>AGCACCCATACAGGTTCTGCAGGTGGTTCCCGACCCGGGCTAGCACGCGTAAGA           |

Mutations (red sequence) consisting of changes in groups of 6 to 7 bp at a time introduced in the P7eNPBE.



Table S5. Primers used to generate overexpression constructs

| Clone       | Primers (5'-3')                                                                                                  |
|-------------|------------------------------------------------------------------------------------------------------------------|
| Klf4        | GGGGACAAGTTTGTACAAAAAAGCAGGCTTAGCCGCCATGGCTGTCAGCGACGCG<br>GGGGACCACTTTGTACAAGAAAGCTGGGTAAAAATGCCTCTTCATGTG      |
| Zeb1        | GGGGACAAGTTTGTACAAAAAAGCAGGCTTAGCCGCCATGGCGGATGGCCCCAGGTGTAA<br>GGGGACCACTTTGTACAAGAAAGCTGGGTAGGCTTCATTTGTCTTTTC |
| DN-<br>cMyb | GCGCTCTAGAAATGGGCCGGAGACCC<br>CTTACCCGGGTTAGGAATTCCAGTGGTTCTT                                                    |
